# Supplementary material for: Porphyrin containing lipophilic amide groups as a photosensitizer for dye-sensitized solar cells
Source: Royal Society of Chemistry journal article supplement (doi:10.1039/c5ra10538b), 2015-01-01
Supplement: c5ra10538b1.pdf [file c5ra10538b1.pdf]

Supporting Information for:

**Porphyrin Containing Lipophilic Amide Groups as Photosensitizer for Dye-sensitized Solar Cells**

Jacek Gasiorowski<sup>a</sup>, Nuttapol Pootrakulchote<sup>b</sup>, Chawanwit Reanprayoon<sup>c</sup>, Kattarina Jaisabuy<sup>d</sup>, Parichat Vanalabhpatana<sup>d</sup>, Niyazi Serdar Sariciftci<sup>a</sup>, Patchanita Thamyongkit<sup>\*d</sup>

<sup>a</sup> Linz Institute for Organic Solar Cells (LIOS), Institute of Physical Chemistry, Johannes Kepler University Linz, Linz 4040, Austria.

<sup>b</sup> Department of Chemical Technology, Faculty of Science, Chulalongkorn University, Bangkok 10330, Thailand.

<sup>c</sup> Program in Petrochemistry and Polymer Science, Faculty of Science, Chulalongkorn University, Bangkok 10330, Thailand.

<sup>d</sup> Department of Chemistry, Faculty of Science, Chulalongkorn University, Bangkok 10330, Thailand. Fax: +662-254-1309; Tel: +662-218-7587; E-mail: patchanita.v@chula.ac.th

**Table of Contents**

|                                             |        |
|---------------------------------------------|--------|
| Characterization data of <b>2</b>           | S2–S4  |
| Characterization data of <b>3</b>           | S5–S7  |
| Characterization data of <b>Zn-5</b>        | S8–S10 |
| Emission spectrum of <b>Zn-5</b> in toluene | S11    |

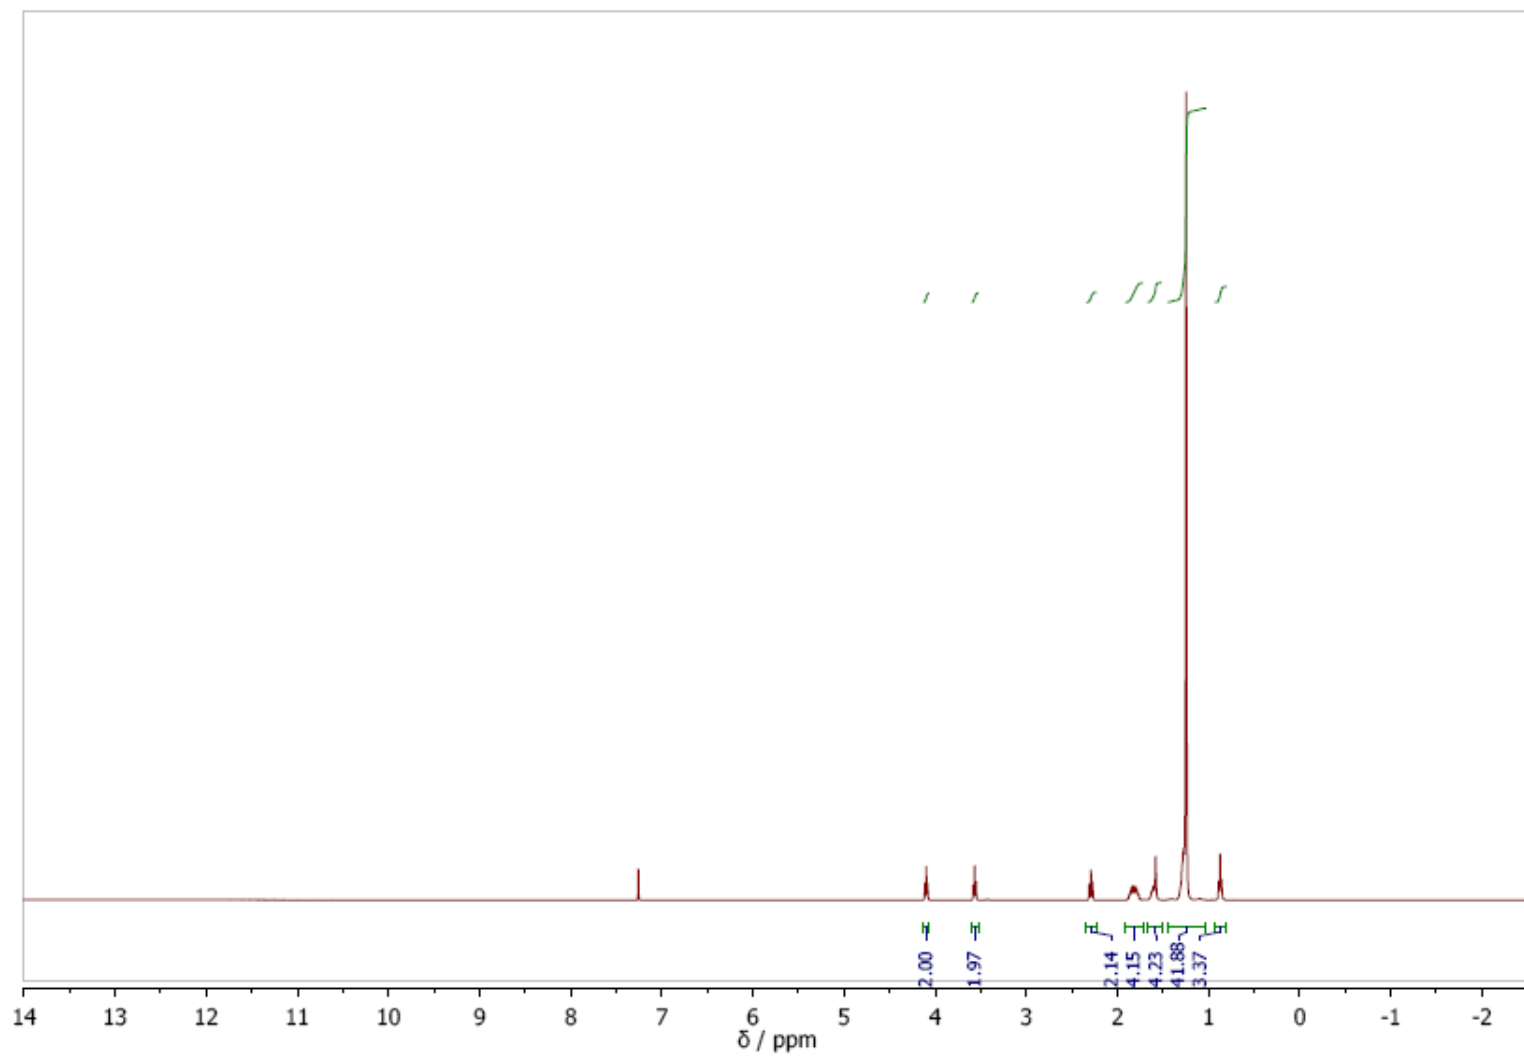

$^1\text{H-NMR}$  spectrum of compound **2** in  $\text{CDCl}_3$

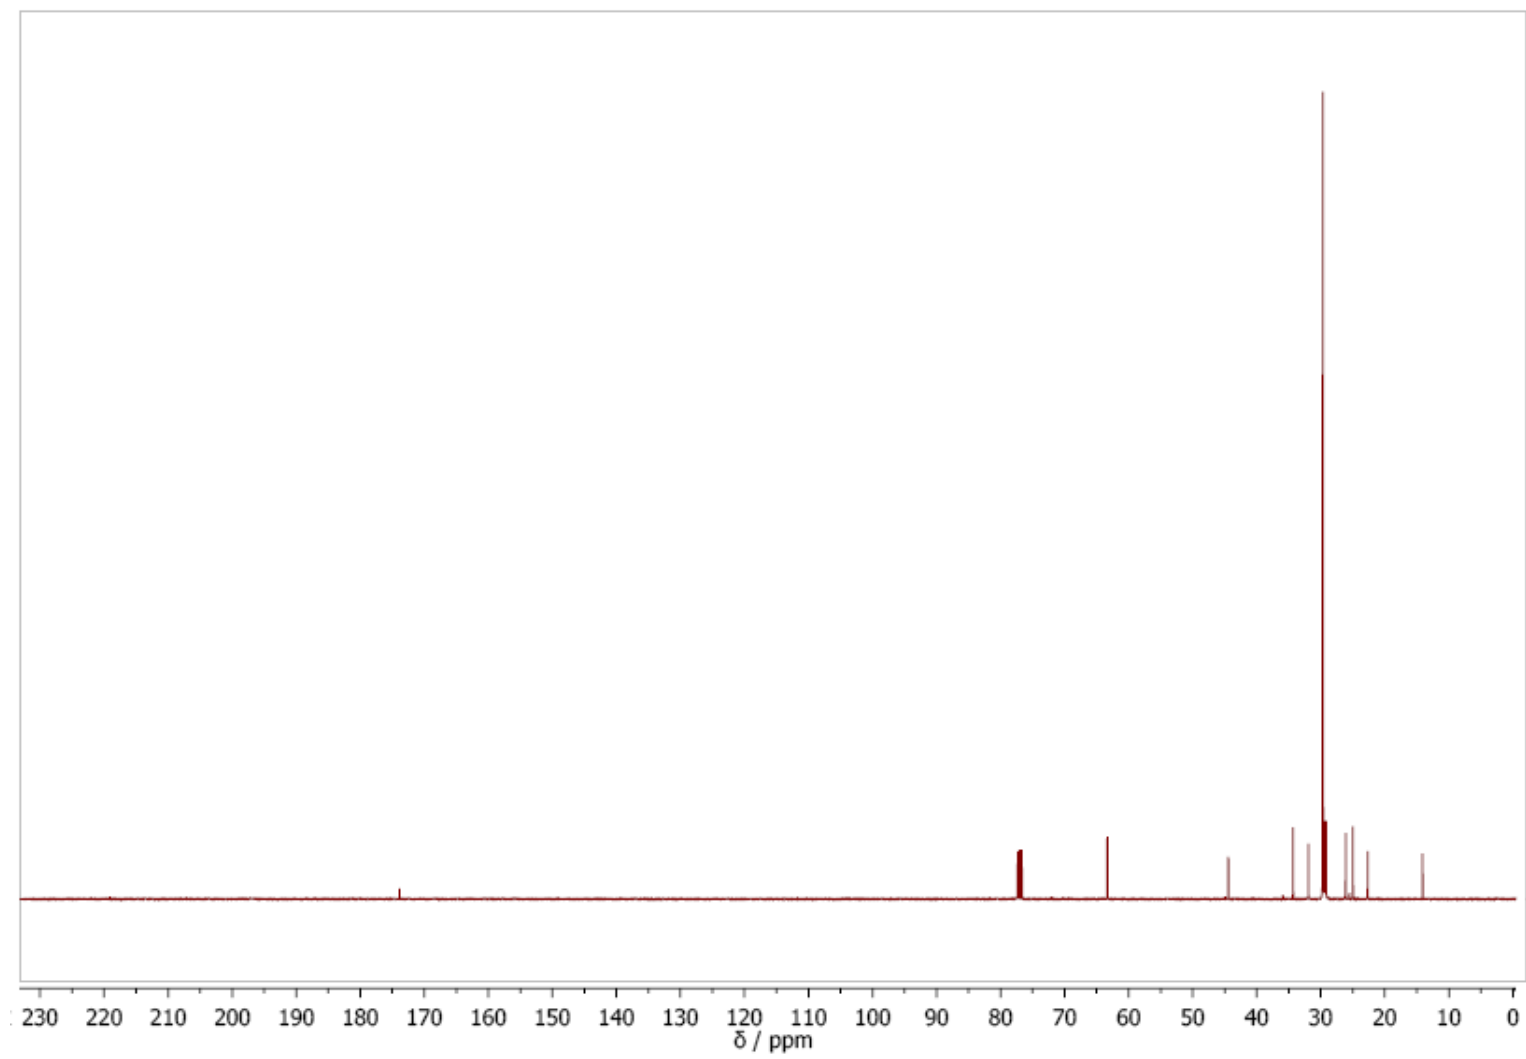

$^{13}\text{C}$ -NMR spectrum of compound **2** in  $\text{CDCl}_3$

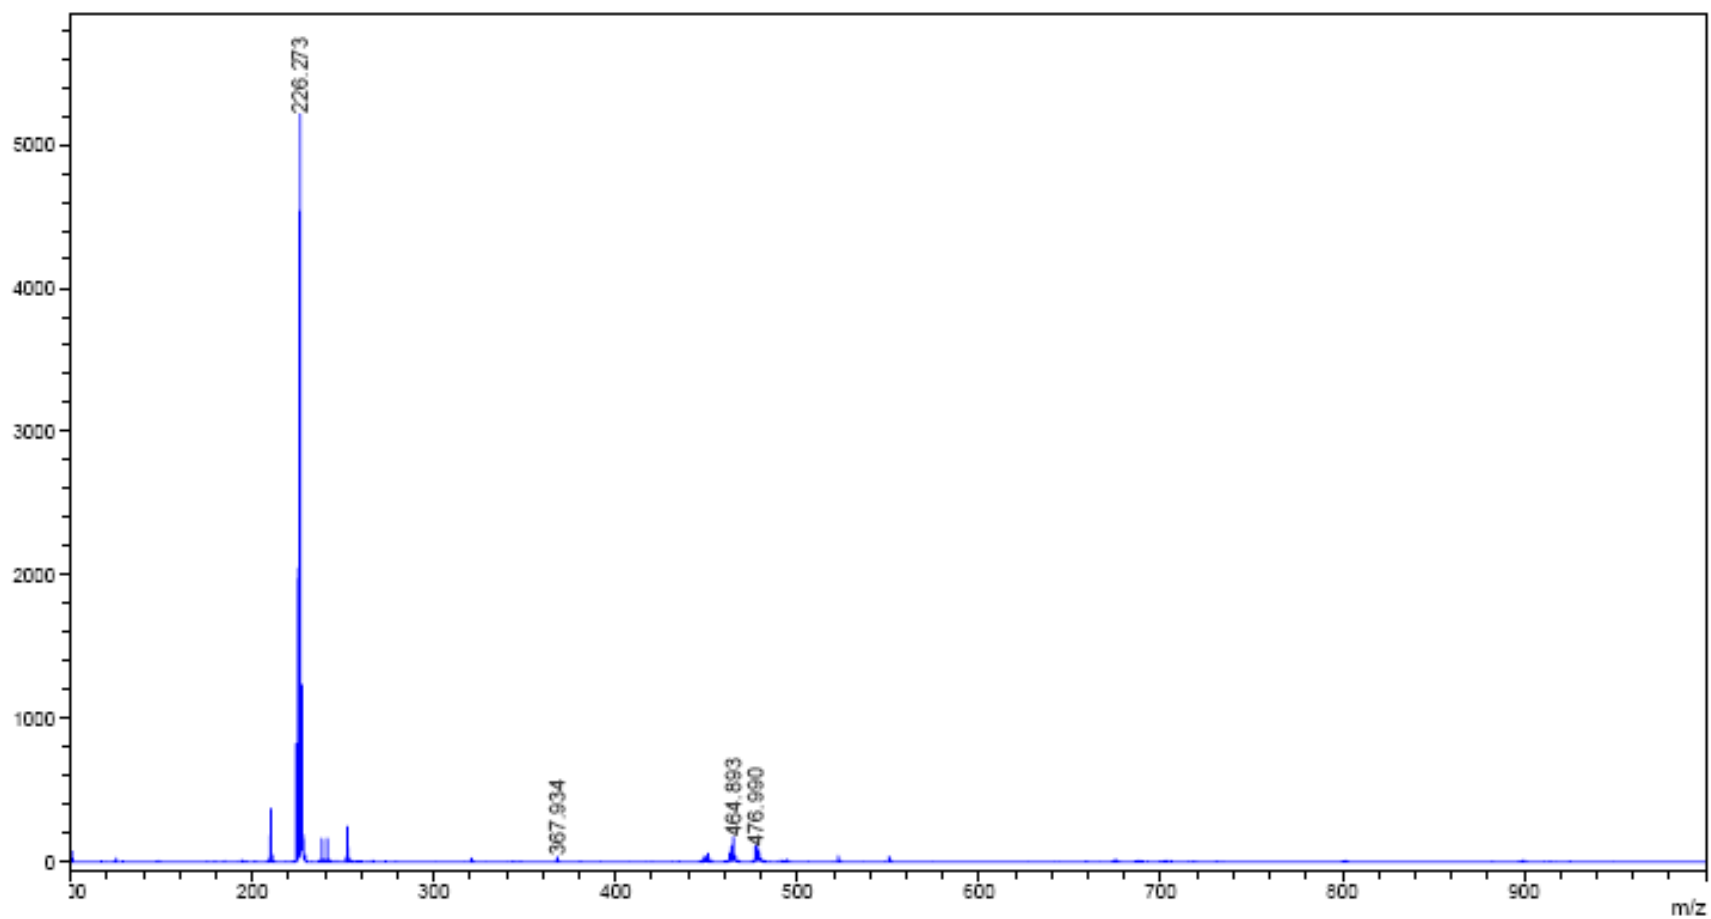

Mass spectrum of compound 2

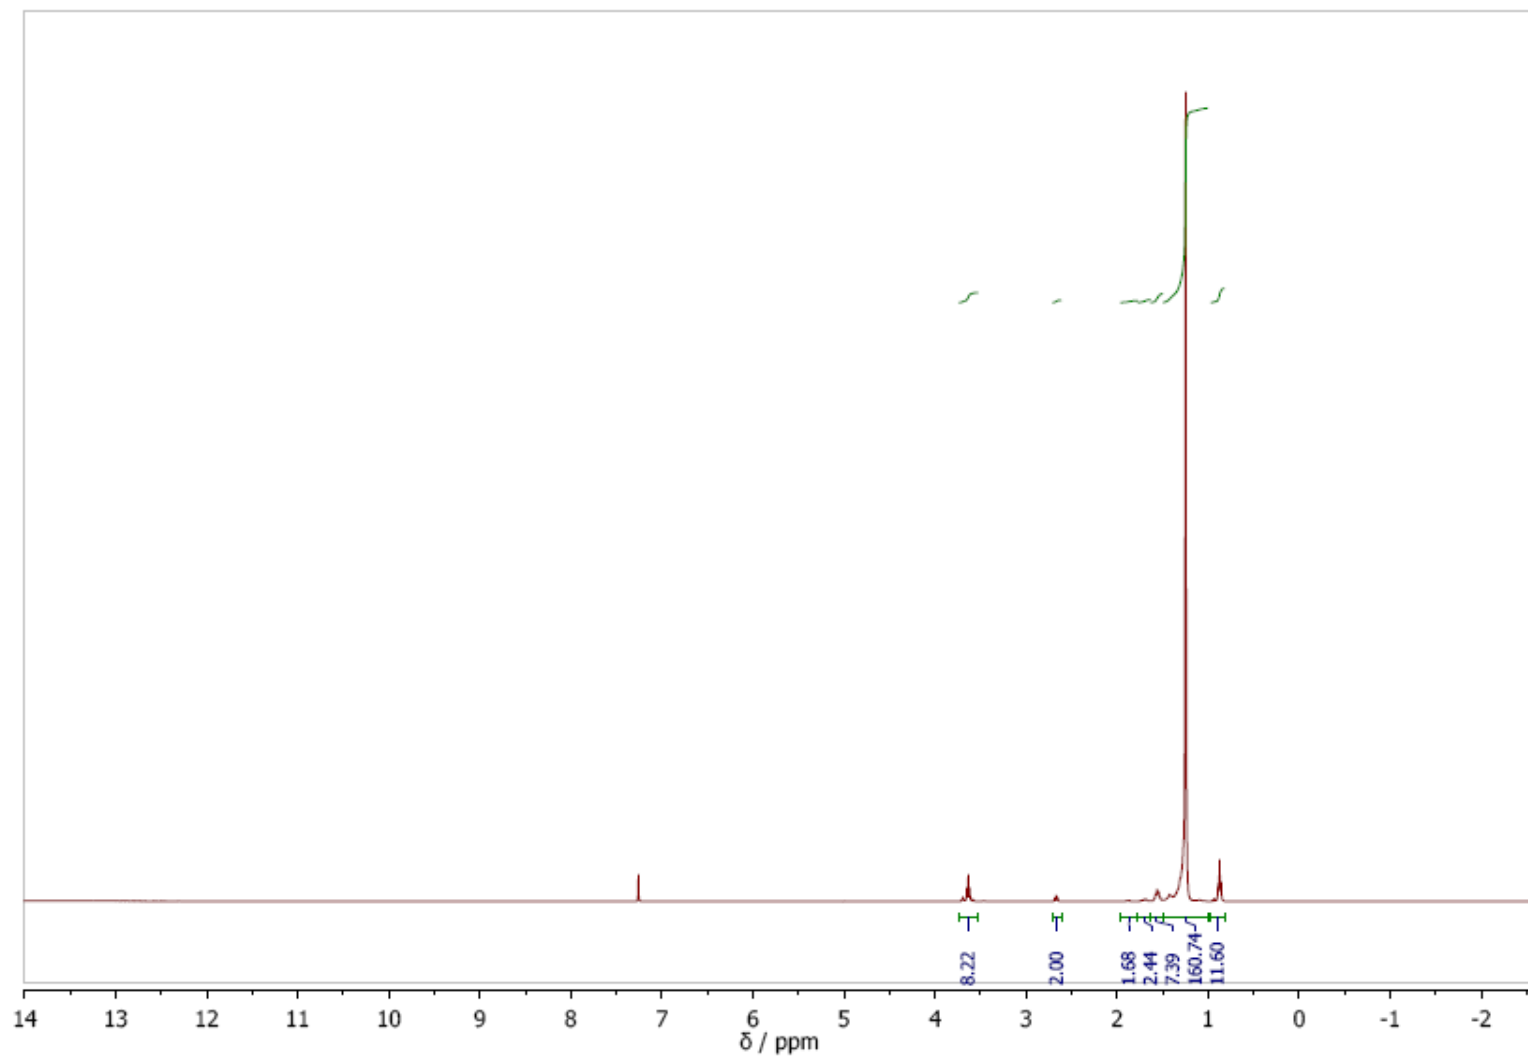

$^1\text{H-NMR}$  spectrum of compound **3** in  $\text{CDCl}_3$

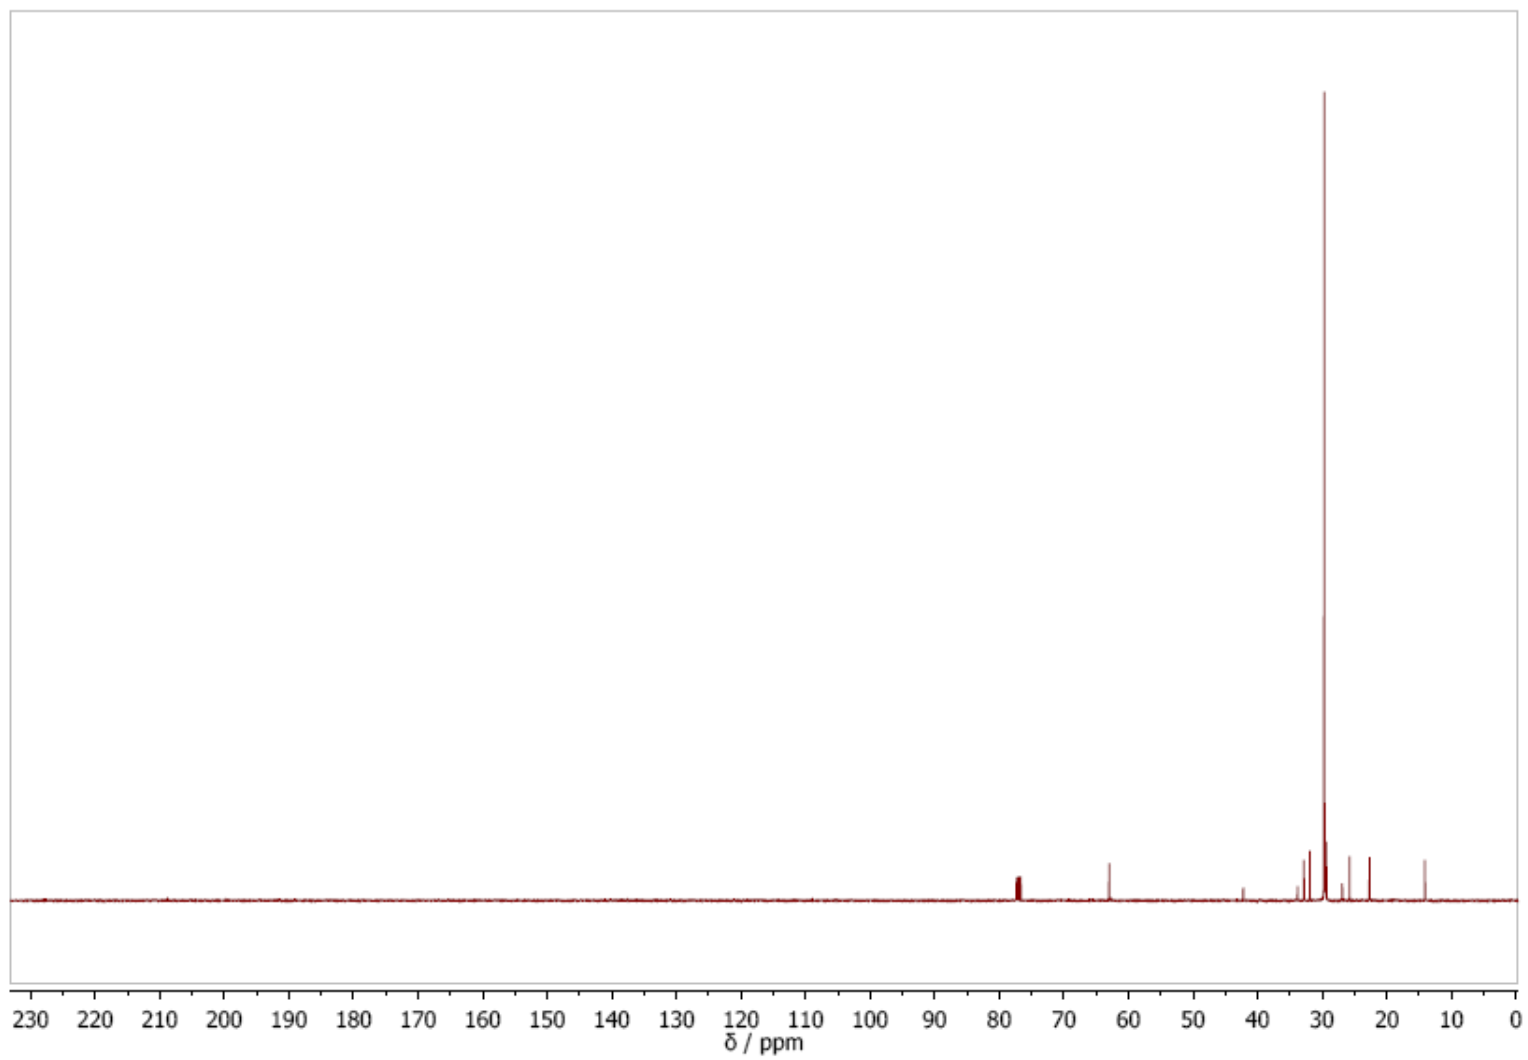

$^{13}\text{C}$ -NMR spectrum of compound **3** in  $\text{CDCl}_3$

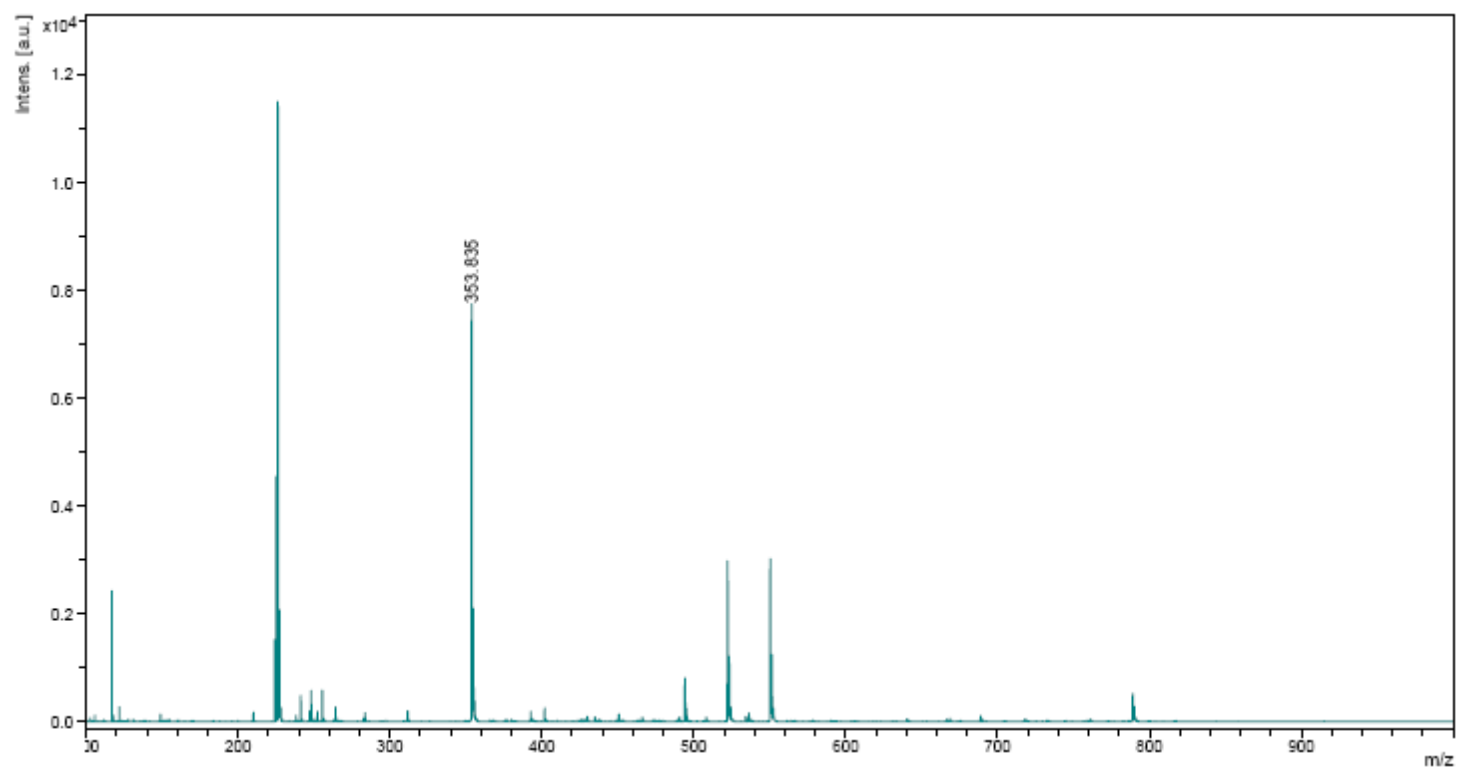

Mass spectrum of compound 3

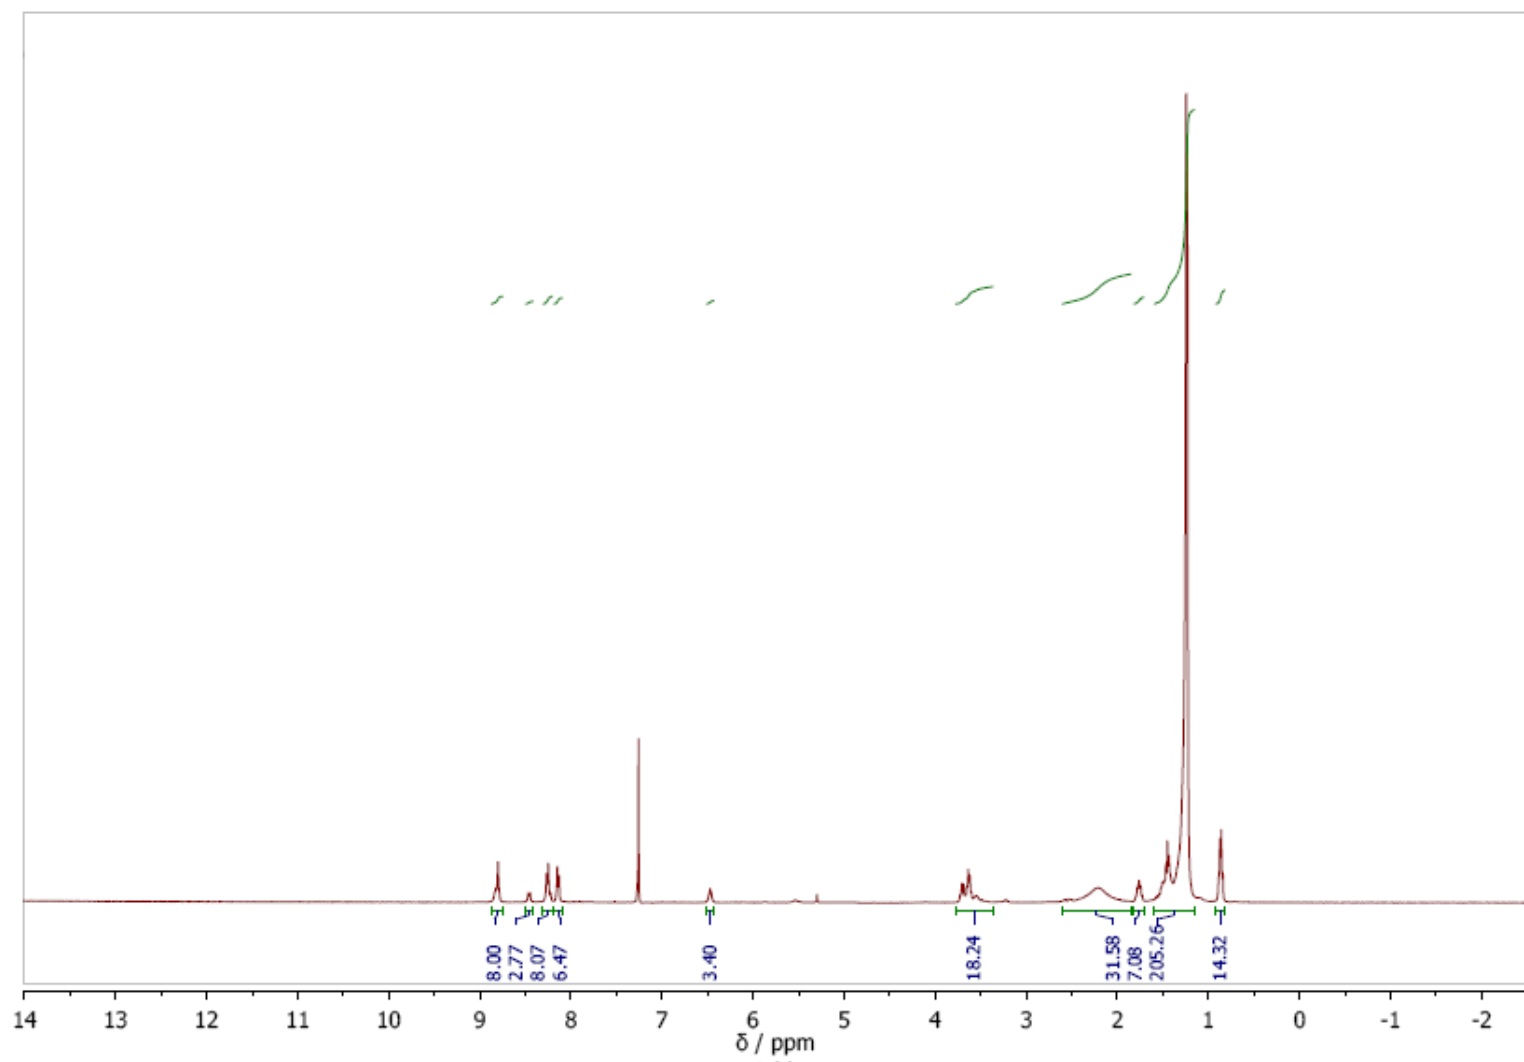

$^1\text{H-NMR}$  spectrum of compound **Zn-5** in  $\text{CDCl}_3$



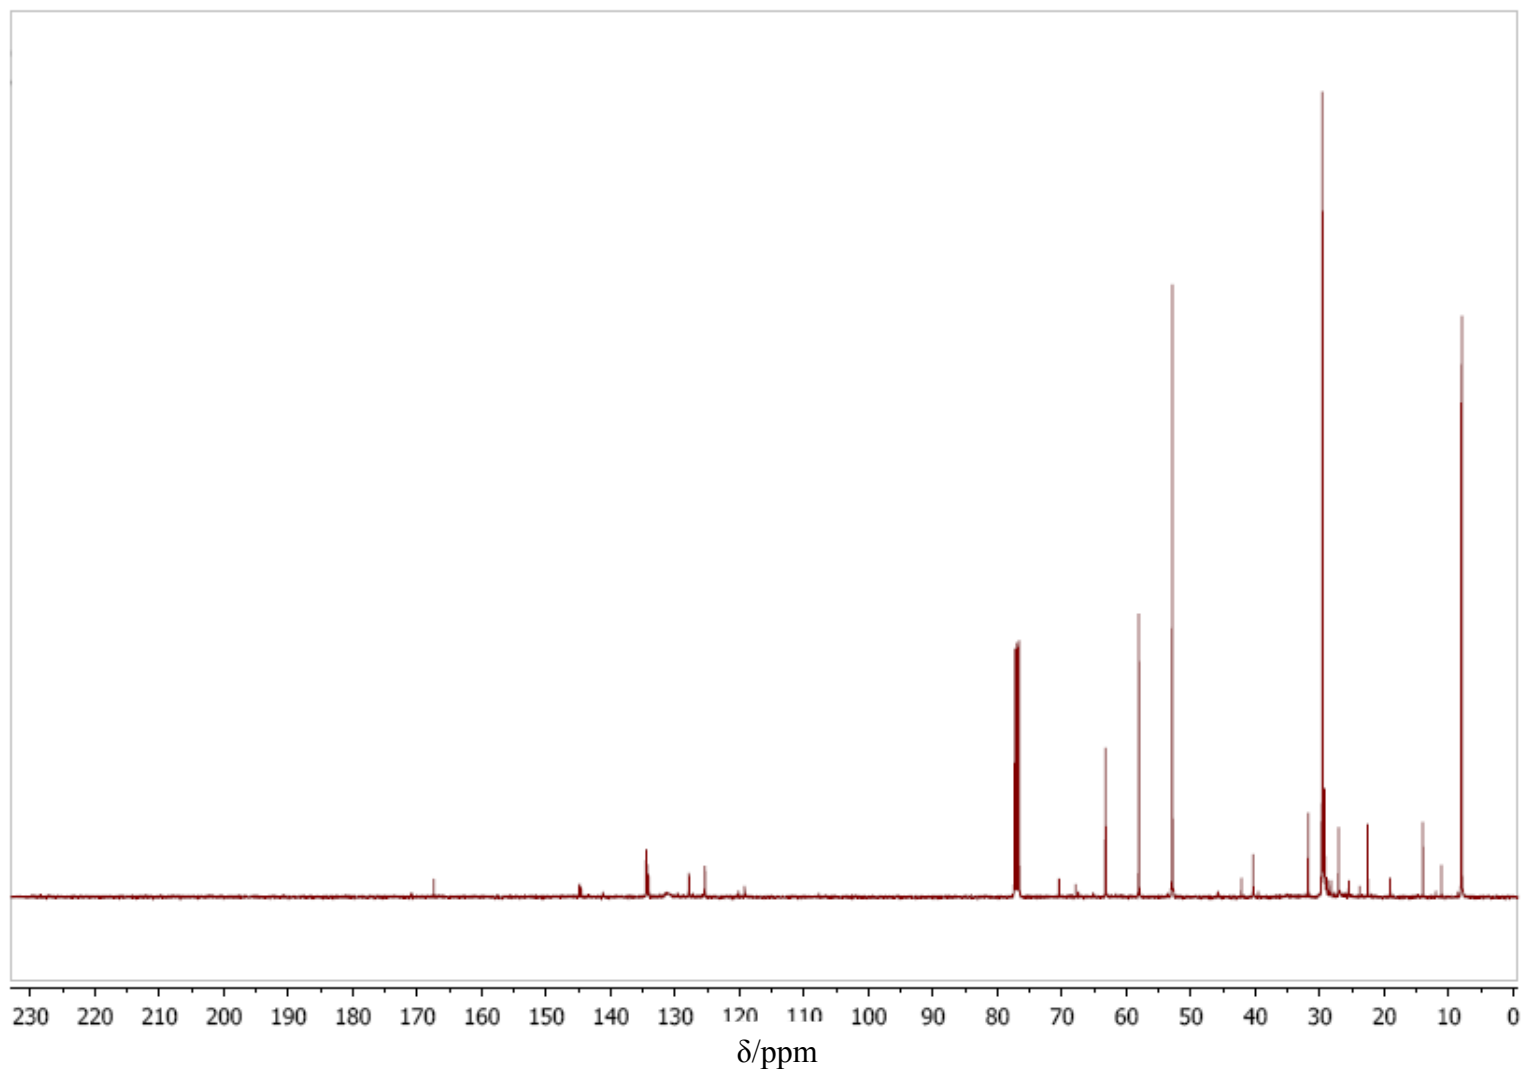

$^{13}\text{C}$ -NMR spectrum of compound **Zn-5** in  $\text{CDCl}_3$

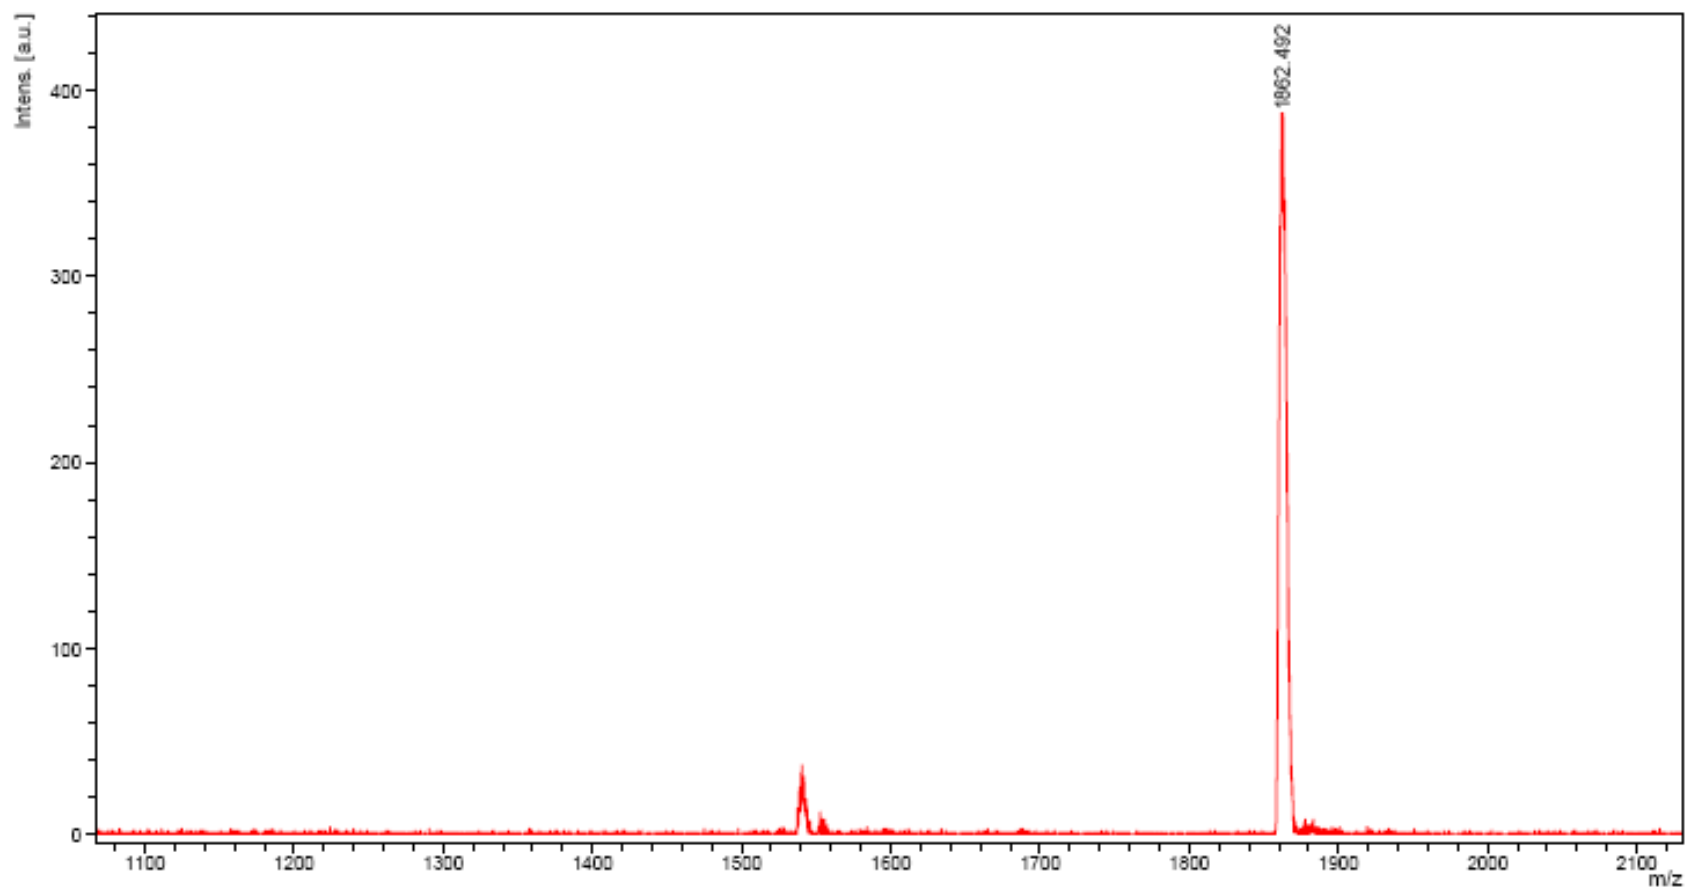

Mass spectrum of compound **Zn-5**

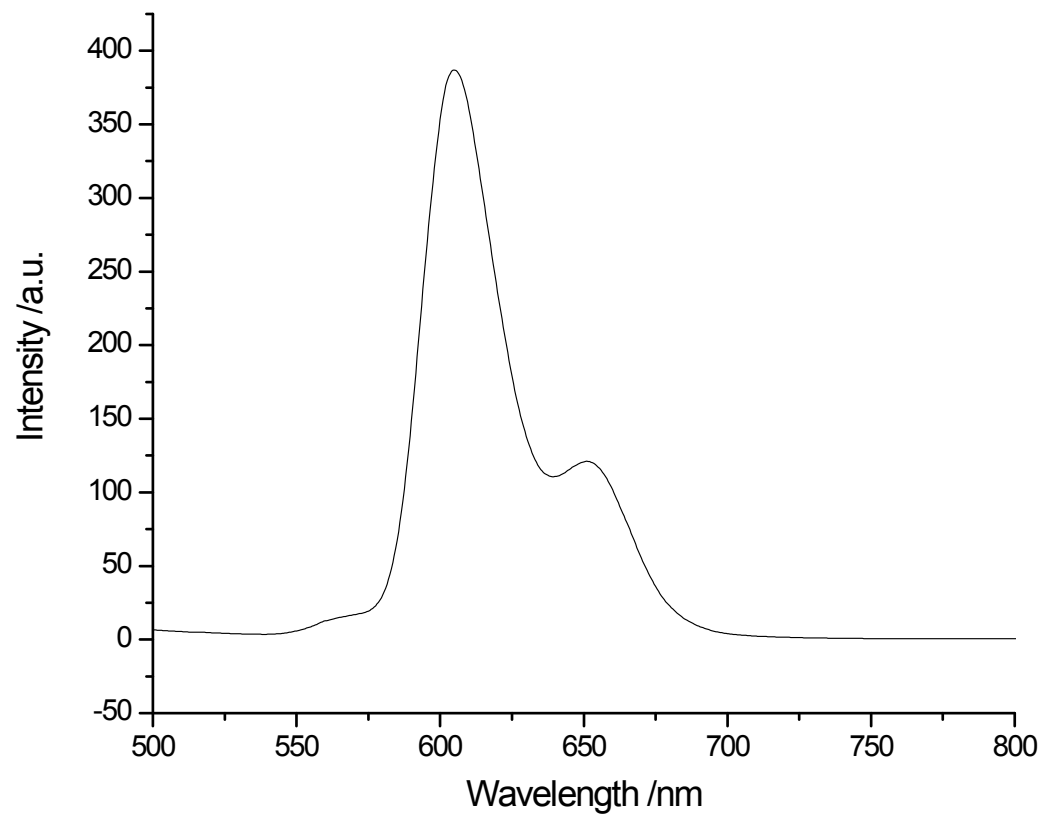

Emission spectrum of compound **Zn-5** in toluene
